# Supplementary material for: Control Strategy for Excipient Variability in the Quality by Design Approach Using Statistical Analysis and Predictive Model: Effect of Microcrystalline Cellulose Variability on Design Space
Source: MDPI journal article supplement (doi:10.3390/pharmaceutics14112416), 2022-11-08
Supplement: s1 [file s1]

Supplementary Material

# Control Strategy for Excipient Variability in the Quality by Design Approach using Statistical Analysis and Predictive Model: Effect of Microcrystalline Cellulose Variability on Design Space

Ji Yeon Kim<sup>1</sup>, Du Hyung Choi<sup>1,\*</sup>

**Table S1.** Experimental design and target value for formulation optimization. (SMCC, silicified microcrystalline cellulose; CCS, croscarmellose sodium; PVP, polyvinylpyrrolidones).

| Control Factors ( $x$ )  |                        | Level          |               |
|--------------------------|------------------------|----------------|---------------|
|                          |                        | Less Than      | Less Than     |
| $x_1$                    | SMCC 90 (mg)           | 66.6           | 89.6          |
| $x_2$                    | CCS (mg)               | 1.0            | 15.0          |
| $x_3$                    | PVP K25 (mg)           | 1.0            | 10.0          |
| Response factors ( $y$ ) |                        | Standard       | Target        |
| $y_1$                    | Hardness (kp)          | -              | 7–10          |
| $y_2$                    | Friability (%)         | Under 1.0      | Under 0.3     |
| $y_3$                    | Dissolution 5 min (%)  | -              | 66.3–96.3     |
| $y_4$                    | Dissolution 10min (%)  | -              | 71.7–100.0    |
| $y_5$                    | Dissolution 15min (%)  | Upper 85       | Upper 85      |
| $y_6$                    | Assay (%)              | 90.0–110.0     | 95.0–105.0    |
| $y_7$                    | Content uniformity (%) | Less than 15.0 | Less than 5.0 |

**Table S2.** Quality target product profile and critical quality attributes for amlodipine tablet. (QTPP, quality target product profile; CQA, critical quality attribute).

| QTPP elements              |                                                                    | Target   | Justification                                                                                      | Is this a CQA? |
|----------------------------|--------------------------------------------------------------------|----------|----------------------------------------------------------------------------------------------------|----------------|
| Dosage form                | Tablet                                                             |          | Pharmaceutical equivalence requirement: same dosage form                                           | No             |
| Dosage design              | Immediate release tablet containing 6.94 mg of amlodipine besylate |          | Immediate release design needed to meet label claims                                               | No             |
| Route of administration    | Oral                                                               |          | Pharmaceutical equivalence requirement: same route of administration                               | No             |
| Dosage strength            | Amlodipine besylate 6.94 mg                                        |          | Pharmaceutical equivalence requirement: same strength                                              | No             |
| Pharmacokinetic properties | Bioequivalent to the Reference drug                                |          | Bioequivalence requirement                                                                         | No             |
| Stability                  | At least 24 months shelf-life at room temperature                  |          | Equivalent to or better than Reference drug shelf-life                                             | No             |
| Drug product               | Assay                                                              | 95–105 % | Variability in the content will affect safety and efficacy. Both formulation and process variables | Yes            |

|                          |                                                                                                                                         |                                                                                                                                                                                                                                    |  |    |
|--------------------------|-----------------------------------------------------------------------------------------------------------------------------------------|------------------------------------------------------------------------------------------------------------------------------------------------------------------------------------------------------------------------------------|--|----|
| quality attributes       |                                                                                                                                         | impact content, so this CQA should be evaluated throughout the product and process development.                                                                                                                                    |  |    |
| Content uniformity       | Conforms to USP<905> uniformity of dosage units                                                                                         | Variability in content uniformity will affect safety and efficacy. Both formulation and process variables impact content uniformity, so this CQA should be evaluated throughout product and process development.                   |  |    |
| Dissolution              | Similar to the Reference drug                                                                                                           | Failure to meet the dissolution specification can impact bioavailability. Both formulation and process variables affect the dissolution profile. This CQA will be investigated throughout the formulation and process development. |  |    |
| Hardness                 | Similar to the Reference drug                                                                                                           | Hardness should be rigid enough not to break during routine handling and should not significantly affect dissolution                                                                                                               |  |    |
| Friability               | Not more than 0.3 % w/w                                                                                                                 | Friability is necessary to minimize the impact of drug loss on the qualitative and efficacy of the drug and to maintain the formulation during packaging.                                                                          |  |    |
| Identification           | 237 nm                                                                                                                                  | Easy to confirm to show unique absorption wavelength in a specific range                                                                                                                                                           |  |    |
| Degradation products     | Pharmaceutical equivalence requirement: Must meet the same applicable (quality) standards (i.e., identity, assay, purity, and quality). |                                                                                                                                                                                                                                    |  | No |
| Residual solvents        |                                                                                                                                         |                                                                                                                                                                                                                                    |  | No |
| Microbial limits         |                                                                                                                                         |                                                                                                                                                                                                                                    |  | No |
| Container closure system | Tight and light-resistant containers                                                                                                    | Container closure system qualified as suitable for this drug product and needed to achieve the target shelf-life and to ensure tablet integrity during shipping                                                                    |  |    |

**Table S3.** Initial risk assessment for formulation development. (MAs, material attributes; CQAs, critical quality attributes; RPN, risk priority number; S, severity; P, probability of occurrence; D, detectability; CU, content uniformity; SMCC, silicified microcrystalline cellulose; CCS, croscarmellose sodium; PVP, polyvinylpyrrolidones; St-Mg, magnesium stearate).

| MAs     | CQAs        | S | P | D | RPN | Risk Degree | Justification                                                                                                                                                                                                                                                                                                                                       |
|---------|-------------|---|---|---|-----|-------------|-----------------------------------------------------------------------------------------------------------------------------------------------------------------------------------------------------------------------------------------------------------------------------------------------------------------------------------------------------|
| SMCC 90 | Assay       | 3 | 3 | 4 | 36  | Medium      | SMCC is considered to have an effect on assay and CU because it accounts for a high ratio in the tablet. Therefore, SMCC poses a medium risk to the assay and CU.                                                                                                                                                                                   |
|         | CU          | 3 | 3 | 4 | 36  | Medium      |                                                                                                                                                                                                                                                                                                                                                     |
|         | Dissolution | 4 | 3 | 4 | 48  | High        | The porosity of SMCC accelerates the swelling and disintegration of tablets, so it can have a great influence on dissolution. Therefore, SMCC poses a high risk to the dissolution. SMCC used as a filler has good compressibility. Therefore, the hardness and friability depending on the amount used, so SMCC poses a high risk to the hardness. |
|         | Hardness    | 4 | 4 | 3 | 48  | High        |                                                                                                                                                                                                                                                                                                                                                     |
|         | Friability  | 4 | 4 | 3 | 48  | High        |                                                                                                                                                                                                                                                                                                                                                     |
| CCS     | Assay       | 2 | 1 | 4 | 8   | Low         | CCS is considered to have a negligible effect on the assay and CU it accounts for a low ratio in the                                                                                                                                                                                                                                                |
|         | CU          | 2 | 1 | 4 | 8   | Low         |                                                                                                                                                                                                                                                                                                                                                     |

|         |             |   |   |   |     |      |                                                                                                                                                                                                                                                     |
|---------|-------------|---|---|---|-----|------|-----------------------------------------------------------------------------------------------------------------------------------------------------------------------------------------------------------------------------------------------------|
|         |             |   |   |   |     |      | tablet. Therefore, CCS poses a low risk to the assay and CU.                                                                                                                                                                                        |
|         | Dissolution | 5 | 5 | 4 | 100 | High | CCS used as disintegrant has properties of absorbing water and swelling it can affect dissolution. Therefore, CCS poses a high risk to dissolution.                                                                                                 |
|         | Hardness    | 2 | 3 | 3 | 18  | Low  | CCS is considered to have a negligible effect on the hardness and friability it accounts for a low ratio in the tablet. Therefore, CCS poses a low risk to the hardness and friability.                                                             |
|         | Friability  | 2 | 3 | 3 | 18  | Low  |                                                                                                                                                                                                                                                     |
| PVP K25 | Assay       | 2 | 1 | 4 | 8   | Low  | PVP is considered to have a negligible effect on the assay and CU it accounts for a low ratio in the tablet. Therefore, PVP poses a low risk to the assay and CU.                                                                                   |
|         | CU          | 2 | 1 | 4 | 8   | Low  |                                                                                                                                                                                                                                                     |
|         | Dissolution | 5 | 5 | 4 | 100 | High | PVP was used as a binder directly related to binding force, it was classified to high impact on dissolution, hardness, and friability.                                                                                                              |
|         | Hardness    | 4 | 4 | 3 | 48  | High |                                                                                                                                                                                                                                                     |
|         | Friability  | 4 | 4 | 3 | 48  | High |                                                                                                                                                                                                                                                     |
| St-Mg   | Assay       | 2 | 1 | 4 | 8   | Low  | Magnesium stearate is considered to have a negligible effect on the assay it accounts for a low ratio in the tablet. Therefore, magnesium stearate poses a low risk to the assay.                                                                   |
|         | CU          | 2 | 2 | 4 | 16  | Low  | Long lubrication times can affect CU due to particle delamination, but magnesium stearate is used in a low proportion in tablets and therefore has less effect on CU. Therefore, magnesium stearate poses a low risk to the CU.                     |
|         | Dissolution | 2 | 1 | 4 | 8   | Low  | Magnesium stearate is considered to have a negligible effect on the dissolution, hardness, and friability since it accounts for a low ratio in the tablet. Therefore, magnesium stearate poses a low risk to dissolution, hardness, and friability. |
|         | Hardness    | 2 | 1 | 3 | 6   | Low  |                                                                                                                                                                                                                                                     |
|         | Friability  | 2 | 1 | 3 | 6   | Low  |                                                                                                                                                                                                                                                     |
|         |             |   |   |   |     |      |                                                                                                                                                                                                                                                     |

#### Criteria of severity, probability of occurrence, and detectability

| Score | Severity (S) | Probability of occurrence (P)           | Detectability (D)            |
|-------|--------------|-----------------------------------------|------------------------------|
| 1     | Irrelevant   | An unlikely probability of occurrence   | High degree of detectability |
| 2     | Slight       | A remote probability of occurrence      | Good detectability           |
| 3     | Important    | An occasional probability of occurrence | Likely to detect             |
| 4     | Critical     | A moderate probability of occurrence    | Fair detectability           |
| 5     | Disastrous   | A high probability of occurrence        | Low or no detectability      |

#### Criteria of RPN

| Risk Degree | RPN  | Justification                                                      |
|-------------|------|--------------------------------------------------------------------|
| Low         | 1-19 | The management is not required since it has little effect on CQAs. |

|        |        |                                                                                                            |
|--------|--------|------------------------------------------------------------------------------------------------------------|
| Medium | 20-39  | The management is necessary since it has a medium effect on CQAs.                                          |
| High   | 40-125 | The management must be necessary since it has a high effect on CQAs if occurs the change of the condition. |

**Table S4.** Result of design space validation. (SMCC, silicified microcrystalline cellulose; CCS, croscarmellose sodium; PVP, polyvinylpyrrolidone).

| Optimal settings |                   |                 | Response factors |                   |                 |        |        |
|------------------|-------------------|-----------------|------------------|-------------------|-----------------|--------|--------|
| $x_1$            | $x_2$             | $x_3$           | $y_1$            | $y_2$             | $y_3$           | $y_4$  | $y_5$  |
| SMCC 90<br>(mg)  | CCS (mg)          | PVP K25<br>(mg) | Hardness<br>(kp) | Friability<br>(%) | Dissolution (%) |        |        |
|                  |                   |                 |                  |                   | 5 min           | 10 min | 15 min |
| 82.30            | 5.80              | 3.47            | 9.08             | 0.14              | 82.81           | 88.71  | 96.24  |
|                  | Target value      |                 | 9.40             | 0.13              | 81.30           | 86.70  | 90.10  |
|                  | Absolute bias     |                 | 0.32             | 0.01              | 1.51            | 2.01   | 6.14   |
|                  | Relative bias (%) |                 | 3.40             | 7.69              | 1.86            | 2.32   | 6.81   |

**Table S5.** Comparison of the MCC monograph specification in pharmacopeia and manufacturers. (MCC, microcrystalline cellulose; USP–NF, United States Pharmacopeia–National Formulary; Ph. Eur., European Pharmacopoeia; JP, Japanese Pharmacopeia; KP, Korean Pharmacopeia; NMT, not more than).

| Attributes                                             | Pharmacopeia     |                    |                               |                               | Manufacturer                      |                                   |                                   |                                            |                                   |
|--------------------------------------------------------|------------------|--------------------|-------------------------------|-------------------------------|-----------------------------------|-----------------------------------|-----------------------------------|--------------------------------------------|-----------------------------------|
|                                                        | USP–NF Monograph | Ph. Eur. Monograph | JP Monograph                  | KP Monograph                  | DFE Pharma                        | FMC BioPolymer                    | Blanver                           | JRS Pharma GmbH & Co. KG VIVAPUR®/Heweten® | PROSOLV® SMCC                     |
| Definition                                             | ○                | ○                  | ○                             | ○                             | ×                                 | ×                                 | ×                                 | ×                                          | ×                                 |
| Characters-Appearance                                  | ×                | ○                  | ×                             | ×                             | ×                                 | ×                                 | ○                                 | ×                                          | ×                                 |
| Characters-Solubility                                  | ×                | ○                  | ×                             | ×                             | ×                                 | ×                                 | ○                                 | ×                                          | ○                                 |
| Description                                            | ×                | ×                  | ○<br>(Appearance, solubility) | ○<br>(Appearance, solubility) | ×                                 | ×                                 | ×                                 | ○<br>(Appearance, solubility)              | ×                                 |
| Identification*                                        |                  |                    |                               |                               | ○                                 |                                   |                                   |                                            |                                   |
| Residue on ignition (Sulfated ash)*, a                 | NMT 0.1%         | NMT 0.1%           | NMT 0.1%                      | NMT 0.1%                      | NMT 0.05%                         | NMT 0.05%                         | NMT 0.05%                         | NMT 0.05%                                  | 1.8–2.2%                          |
| Residual solvent                                       | ×                | ×                  | ×                             | ×                             | ×                                 | ×                                 | ×                                 | ×                                          | ○                                 |
| Solubility (Ammoniacal solution of copper tetramine R) | ×                | ○                  | ×                             | ×                             | ○                                 | ○                                 | ×                                 | ○                                          | ×                                 |
| Conductivity*, a                                       | 75 µS/cm         | 75 µS/cm           | 75 µS/cm                      | 75 µS/cm                      | 75 µS/cm                          | 75 µS/cm                          | 75 µS/cm                          | 50 µS/cm                                   | 75 µS/cm                          |
| pH*, a                                                 | 5.0–7.5          | 5.0–7.5            | 5.0–7.5                       | 5.0–7.5                       | 5.5–7.0                           | 5.5–7.0                           | 5.0–7.0                           | 5.0–7.0                                    | 5.0–7.0                           |
| Loss on drying*, a                                     | NMT 7.0%         | NMT 7.0%           | NMT 7.0%                      | NMT 7.0%                      | ○<br>(Dependent on product grade)          | ○<br>(Dependent on product grade) |

| Table 1. Quality attributes of the product and their acceptance criteria. |                       |                       |                       |                       |                                   |                                   |                                   |                                   |                                   |
|---------------------------------------------------------------------------|-----------------------|-----------------------|-----------------------|-----------------------|-----------------------------------|-----------------------------------|-----------------------------------|-----------------------------------|-----------------------------------|
| Quality attribute                                                         | Attribute 1           | Attribute 2           | Attribute 3           | Attribute 4           | Attribute 5                       | Attribute 6                       | Attribute 7                       | Attribute 8                       | Attribute 9                       |
| Bulk density                                                              | ○                     | ×                     | ○                     | ○                     | ○<br>(Dependent on product grade) |
| Tapped density                                                            | ×                     | ×                     | ×                     | ×                     | ×                                 | ×                                 | ×                                 | ×                                 | ○                                 |
| Particle size <sup>c</sup>                                                | ×                     | ×                     | ×                     | ×                     | ○<br>(Dependent on product grade) |
| Particle size distribution                                                | ○                     | ○                     | ×                     | ×                     | ○<br>(Dependent on product grade) | ○<br>(Dependent on product grade) | ×                                 | ○<br>(Dependent on product grade) | ○<br>(Dependent on product grade) |
| Powder flow                                                               | ×                     | ○                     | ×                     | ×                     | ×                                 | ×                                 | ×                                 | ○                                 | ×                                 |
| Water-soluble substances <sup>*, a</sup>                                  | 12.5 mg (0.25%)       | 12.5 mg (0.25%)       | 12.5 mg               | 12.5 mg               | 0.20%                             | 12.5 mg (0.25%)                   | 0.24%                             | 0.24%                             | 0.24%                             |
| Ether-soluble substances <sup>*, a</sup>                                  | 5.0 mg (0.05%)        | 5.0 mg (0.05%)        | 5.0 mg                | 5.0 mg                | 0.05%                             | 5.0mg                             | 0.05%                             | 0.05%                             | 0.05%                             |
| Heavy metals                                                              | ×                     | NMT 10 ppm            | NMT 10 ppm            | NMT 10 ppm            | NMT 10 ppm                        | NMT 10 ppm                        | NMT 10 ppm                        | NMT 10 ppm                        | NMT 10 ppm                        |
| Mercury                                                                   | ×                     | ×                     | ×                     | ○                     | NMT 1.0 ppm                       | ×                                 | ×                                 | ×                                 | ×                                 |
| Cadmium                                                                   | ×                     | ×                     | ×                     | ○                     | NMT 1.0 ppm                       | ×                                 | ×                                 | ×                                 | ×                                 |
| Lead                                                                      | ×                     | ×                     | ×                     | ○                     | NMT 2.0 ppm                       | ×                                 | ×                                 | ×                                 | ×                                 |
| Arsenic                                                                   | ×                     | ×                     | ×                     | ○                     | NMT 4.0 ppm                       | NMT 2.0 ppm                       | ×                                 | ×                                 | ×                                 |
| Starch                                                                    | ×                     | ×                     | ×                     | ○                     | ○                                 | ○                                 | ×                                 | ×                                 | ×                                 |
| Total aerobic microbial count <sup>*, a</sup>                             | 10 <sup>3</sup> CFU/g | 10 <sup>3</sup> CFU/g | 10 <sup>3</sup> CFU/g | 10 <sup>3</sup> CFU/g | 100 CFU/g                         | 100 CFU/g                         | 10 <sup>3</sup> CFU/g             | 100 CFU/g                         | 100 CFU/g                         |
| Total combined moulds and yeasts count <sup>*, a</sup>                    | 10 <sup>2</sup> CFU/g | 10 <sup>2</sup> CFU/g | 10 <sup>2</sup> CFU/g | 10 <sup>2</sup> CFU/g | 20 CFU/g                          | 20 CFU/g                          | 10 <sup>2</sup> CFU/g             | 20 CFU/g                          | 20 CFU/g                          |

|                                                             |                  |   |                  |                  |                                                                                                                                                                                                    |                                                     |   |                                                                 |   |
|-------------------------------------------------------------|------------------|---|------------------|------------------|----------------------------------------------------------------------------------------------------------------------------------------------------------------------------------------------------|-----------------------------------------------------|---|-----------------------------------------------------------------|---|
|                                                             |                  |   |                  |                  |                                                                                                                                                                                                    |                                                     |   |                                                                 |   |
|                                                             |                  |   |                  |                  |                                                                                                                                                                                                    |                                                     |   |                                                                 |   |
| Absence of Staphylococcus aureus*, <sup>b</sup>             |                  |   |                  |                  | ○                                                                                                                                                                                                  |                                                     |   |                                                                 |   |
| Absence of Pseudomonas aeruginosa*, <sup>b</sup>            |                  |   |                  |                  | ○                                                                                                                                                                                                  |                                                     |   |                                                                 |   |
| Absence of Escherichia coli*, <sup>b</sup>                  |                  |   |                  |                  | ○                                                                                                                                                                                                  |                                                     |   |                                                                 |   |
| Absence of Salmonella species*, <sup>b</sup>                |                  |   |                  |                  | ○                                                                                                                                                                                                  |                                                     |   |                                                                 |   |
| Absence of Enterobacteriaceae                               | ×                | × | ×                | ×                | ×                                                                                                                                                                                                  | ×                                                   | × | ○                                                               | × |
| Absence of Coliform species                                 | ×                | × | ×                | ×                | ×                                                                                                                                                                                                  | ○                                                   | × | ×                                                               | × |
|                                                             |                  |   |                  |                  |                                                                                                                                                                                                    |                                                     |   |                                                                 |   |
| Packaging and Storage                                       | Tight containers | × | Tight containers | Tight containers | A white multi-layered polyethylene bag with a polyethylene inner liner. Keep in original, unopened packing in ambient conditions, protected from humidity and away from strongly odorous materials | Store at ambient conditions. Keep containers sealed | × | Protect from excessive heat and moisture. Keep container closed | × |
|                                                             |                  |   |                  |                  |                                                                                                                                                                                                    |                                                     |   |                                                                 |   |
| <b>Local requirements</b>                                   |                  |   |                  |                  |                                                                                                                                                                                                    |                                                     |   |                                                                 |   |
| <b>USP–NF Monograph</b>                                     |                  |   |                  |                  | <b>Ph. Eur. Monograph</b>                                                                                                                                                                          |                                                     |   | <b>JP Monograph</b>                                             |   |
| Particle size distribution estimation by analytical sieving |                  |   |                  |                  | Solubility, functionality-related characteristics (particle size distribution, powder flow)                                                                                                        |                                                     |   | Definition (reference to labeling), heavy metals                |   |

\* Attributes that were harmonized among pharmacopeia.

<sup>a</sup> Attributes that were contained in all pharmacopeia and manufacturers, but the criteria were not harmonized.

<sup>b</sup> Attributes that were contained in all pharmacopeia and manufacturers.

<sup>c</sup> Attributes that were contained in manufacturers.



**Table S6.** Risk assessment for microcrystalline cellulose. (CQAs, critical quality attributes; CU, content uniformity; IR, Infrared spectroscopy; LOD, loss on drying; PSD, particle size distribution).

| Attributes                                             | CQAs   |        |             |          |            |
|--------------------------------------------------------|--------|--------|-------------|----------|------------|
|                                                        | Assay  | CU     | Dissolution | Hardness | Friability |
| Appearance                                             | Low    | Low    | Low         | Low      | Low        |
| Solubility                                             | Low    | Low    | Medium      | Low      | Low        |
| Identification A (IR)                                  | Low    | Low    | Low         | Low      | Low        |
| Identification B (Wet chemistry)                       | Low    | Low    | Low         | Low      | Low        |
| Identification C (Degree of polymerization)            | Medium | Medium | Medium      | Medium   | Medium     |
| Residue on ignition (Sulfated ash)                     | Low    | Low    | Low         | Low      | Low        |
| Residual solvent                                       | Low    | Low    | Low         | Low      | Low        |
| Solubility (Ammoniacal solution of copper tetramine R) | Low    | Low    | Low         | Low      | Low        |
| Conductivity                                           | Low    | Low    | Low         | Low      | Low        |
| pH                                                     | Low    | Low    | Medium      | Low      | Low        |
| Loss on drying                                         | Medium | Medium | High        | High     | High       |
| Bulk density                                           | High   | High   | High        | High     | High       |
| Tapped density                                         | High   | High   | High        | High     | High       |
| True density                                           | Low    | Low    | Low         | Medium   | Medium     |
| Particle size                                          | High   | High   | High        | High     | High       |
| Particle size distribution                             | High   | High   | High        | High     | High       |
| Powder flow                                            | Medium | Medium | Medium      | Medium   | Medium     |
| Water-soluble substances                               | Low    | Low    | Low         | Low      | Low        |
| Ether-soluble substances                               | Low    | Low    | Low         | Low      | Low        |
| Heavy metals                                           | Low    | Low    | Low         | Low      | Low        |
| Mercury                                                | Low    | Low    | Low         | Low      | Low        |
| Cadmium                                                | Low    | Low    | Low         | Low      | Low        |
| Lead                                                   | Low    | Low    | Low         | Low      | Low        |
| Arsenic                                                | Low    | Low    | Low         | Low      | Low        |
| Starch                                                 | Low    | Low    | Low         | Low      | Low        |
| Total aerobic microbial count                          | Low    | Low    | Low         | Low      | Low        |
| Total combined molds and yeasts count                  | Low    | Low    | Low         | Low      | Low        |
| Absence of <i>Staphylococcus aureus</i>                | Low    | Low    | Low         | Low      | Low        |
| Absence of <i>Pseudomonas aeruginosa</i>               | Low    | Low    | Low         | Low      | Low        |
| Absence of <i>Escherichia coli</i>                     | Low    | Low    | Low         | Low      | Low        |

---

|                                      |     |     |     |     |     |
|--------------------------------------|-----|-----|-----|-----|-----|
| Absence of <i>Salmonella species</i> | Low | Low | Low | Low | Low |
| Absence of <i>Enterobacteriaceae</i> | Low | Low | Low | Low | Low |
| Absence of <i>Coliform species</i>   | Low | Low | Low | Low | Low |
| Packaging and Storage                | Low | Low | Low | Low | Low |

**Table S7.** Pearson correlation coefficients. (LOD, loss on drying;  $q_p$ , true density;  $q_b$ , bulk density;  $q_t$ , tapped density; HR, Hausner ratio; CI, compressibility index; P, powder porosity; BFE, basic flowability energy; SI, stability index; FRI, flow rate index; SE, specific energy; CBD, conditioned bulk density; CU, content uniformity; Diss., dissolution).

| Variable    | LOD    | pH     | D10    | D50    | D90    | $q_b$  | $q_t$  | $q_p$  | HR     | CI     | P      | BFE    | SI     | FRI    | SE     | CBD    | Assay  | CU     | Diss. 5min | Diss. 10min | Diss. 15min | Hardness | Friability |
|-------------|--------|--------|--------|--------|--------|--------|--------|--------|--------|--------|--------|--------|--------|--------|--------|--------|--------|--------|------------|-------------|-------------|----------|------------|
| LOD         | 1.000  |        |        |        |        |        |        |        |        |        |        |        |        |        |        |        |        |        |            |             |             |          |            |
| pH          | 0.248  | 1.000  |        |        |        |        |        |        |        |        |        |        |        |        |        |        |        |        |            |             |             |          |            |
| D10         | -0.209 | -0.235 | 1.000  |        |        |        |        |        |        |        |        |        |        |        |        |        |        |        |            |             |             |          |            |
| D50         | -0.148 | -0.252 | 0.894  | 1.000  |        |        |        |        |        |        |        |        |        |        |        |        |        |        |            |             |             |          |            |
| D90         | -0.086 | -0.209 | 0.743  | 0.897  | 1.000  |        |        |        |        |        |        |        |        |        |        |        |        |        |            |             |             |          |            |
| $q_b$       | 0.256  | -0.242 | 0.364  | 0.396  | 0.405  | 1.000  |        |        |        |        |        |        |        |        |        |        |        |        |            |             |             |          |            |
| $q_t$       | 0.085  | 0.107  | 0.269  | 0.164  | 0.097  | 0.319  | 1.000  |        |        |        |        |        |        |        |        |        |        |        |            |             |             |          |            |
| $q_p$       | 0.237  | -0.337 | 0.123  | 0.107  | 0.143  | 0.161  | -0.275 | 1.000  |        |        |        |        |        |        |        |        |        |        |            |             |             |          |            |
| HR          | -0.167 | 0.311  | -0.191 | -0.304 | -0.367 | -0.692 | 0.446  | -0.382 | 1.000  |        |        |        |        |        |        |        |        |        |            |             |             |          |            |
| CI          | -0.202 | 0.313  | -0.143 | -0.257 | -0.316 | -0.719 | 0.421  | -0.371 | 0.972  | 1.000  |        |        |        |        |        |        |        |        |            |             |             |          |            |
| P           | -0.247 | 0.229  | -0.361 | -0.394 | -0.401 | -0.999 | -0.332 | -0.119 | 0.680  | 0.707  | 1.000  |        |        |        |        |        |        |        |            |             |             |          |            |
| BFE         | 0.037  | -0.381 | 0.618  | 0.651  | 0.702  | 0.328  | 0.022  | 0.333  | -0.374 | -0.267 | -0.317 | 1.000  |        |        |        |        |        |        |            |             |             |          |            |
| SI          | 0.648  | 0.108  | -0.111 | -0.110 | -0.143 | 0.051  | 0.003  | 0.239  | -0.050 | -0.072 | -0.040 | 0.030  | 1.000  |        |        |        |        |        |            |             |             |          |            |
| FRI         | -0.095 | 0.403  | -0.412 | -0.577 | -0.675 | -0.644 | 0.027  | -0.289 | 0.695  | 0.626  | 0.637  | -0.687 | -0.075 | 1.000  |        |        |        |        |            |             |             |          |            |
| SE          | -0.089 | 0.274  | -0.370 | -0.612 | -0.703 | -0.602 | -0.097 | -0.109 | 0.529  | 0.509  | 0.601  | -0.368 | 0.149  | 0.758  | 1.000  |        |        |        |            |             |             |          |            |
| CBD         | 0.077  | -0.247 | 0.358  | 0.374  | 0.353  | 0.862  | 0.260  | 0.095  | -0.633 | -0.625 | -0.863 | 0.266  | -0.045 | -0.614 | -0.590 | 1.000  |        |        |            |             |             |          |            |
| Assay       | -0.232 | -0.063 | -0.070 | 0.174  | 0.308  | 0.068  | -0.099 | -0.147 | -0.144 | -0.145 | -0.075 | -0.105 | -0.551 | -0.278 | -0.611 | 0.008  | 1.000  |        |            |             |             |          |            |
| CU          | 0.213  | 0.019  | 0.070  | -0.160 | -0.227 | -0.113 | 0.145  | 0.100  | 0.191  | 0.224  | 0.119  | 0.245  | 0.503  | 0.154  | 0.591  | -0.054 | -0.855 | 1.000  |            |             |             |          |            |
| Diss. 5min  | -0.106 | 0.276  | -0.383 | -0.356 | -0.361 | -0.119 | -0.097 | -0.371 | 0.111  | 0.020  | 0.105  | -0.750 | -0.313 | 0.372  | 0.013  | -0.019 | 0.388  | -0.440 | 1.000      |             |             |          |            |
| Diss. 10min | -0.084 | 0.328  | -0.367 | -0.347 | -0.353 | -0.167 | -0.034 | -0.384 | 0.209  | 0.101  | 0.153  | -0.774 | -0.259 | 0.417  | 0.073  | -0.099 | 0.370  | -0.388 | 0.971      | 1.000       |             |          |            |
| Diss. 15min | -0.107 | 0.316  | -0.392 | -0.369 | -0.380 | -0.179 | -0.098 | -0.363 | 0.163  | 0.074  | 0.166  | -0.785 | -0.276 | 0.396  | 0.067  | -0.081 | 0.384  | -0.416 | 0.984      | 0.987       | 1.000       |          |            |
| Hardness    | 0.134  | -0.261 | 0.366  | 0.338  | 0.394  | 0.131  | 0.068  | 0.326  | -0.143 | -0.041 | -0.119 | 0.851  | 0.174  | -0.403 | -0.070 | 0.022  | -0.308 | 0.385  | -0.905     | -0.915      | -0.933      | 1.000    |            |
| Friability  | 0.024  | 0.362  | -0.359 | -0.363 | -0.378 | -0.112 | -0.096 | -0.351 | 0.116  | 0.007  | 0.099  | -0.776 | -0.159 | 0.427  | 0.092  | -0.008 | 0.249  | -0.305 | 0.919      | 0.940       | 0.939       | -0.908   | 1.000      |

**Table S8.** Explanation of variance.

| Component | Initial eigenvalue |              |                  | Extract square and load |              |                  |
|-----------|--------------------|--------------|------------------|-------------------------|--------------|------------------|
|           | Total              | Variance (%) | Accumulation (%) | Total                   | Variance (%) | Accumulation (%) |
| 1         | 6.763              | 42.266       | 42.266           | 6.763                   | 42.266       | 42.266           |
| 2         | 2.551              | 15.943       | 58.209           | 2.551                   | 15.943       | 58.209           |
| 3         | 1.919              | 11.997       | 70.206           | 1.919                   | 11.997       | 70.206           |
| 4         | 1.587              | 9.916        | 80.122           | 1.587                   | 9.916        | 80.122           |
| 5         | 0.953              | 5.957        | 86.079           |                         |              |                  |
| 6         | 0.630              | 3.936        | 90.015           |                         |              |                  |
| 7         | 0.519              | 3.245        | 93.260           |                         |              |                  |
| 8         | 0.419              | 2.616        | 95.876           |                         |              |                  |
| 9         | 0.293              | 1.833        | 97.710           |                         |              |                  |
| 10        | 0.167              | 1.046        | 98.756           |                         |              |                  |
| 11        | 0.091              | 0.570        | 99.326           |                         |              |                  |
| 12        | 0.051              | 0.321        | 99.647           |                         |              |                  |
| 13        | 0.040              | 0.250        | 99.897           |                         |              |                  |
| 14        | 0.015              | 0.092        | 99.989           |                         |              |                  |
| 15        | 0.002              | 0.011        | 100.000          |                         |              |                  |
| 16        | 0.000              | 0.000        | 100.000          |                         |              |                  |

**Table S9.** Component and score coefficient matrix. (LOD, loss on drying; BFE, basic flowability energy; SI, stability index; FRI, flow rate index; SE, specific energy; CBD, conditioned bulk density).

| Variable        |          | Component |        |        |        | Score coefficient |        |        |        |
|-----------------|----------|-----------|--------|--------|--------|-------------------|--------|--------|--------|
|                 |          | 1         | 2      | 3      | 4      | 1                 | 2      | 3      | 4      |
| LOD             | $a_1$    | 0.106     | -0.605 | 0.315  | 0.599  | 0.016             | -0.237 | 0.164  | 0.377  |
| pH              | $a_2$    | -0.424    | -0.073 | 0.417  | 0.153  | -0.063            | -0.029 | 0.217  | 0.096  |
| D10             | $a_3$    | 0.614     | 0.613  | 0.009  | 0.219  | 0.091             | 0.240  | 0.005  | 0.138  |
| D50             | $a_4$    | 0.721     | 0.573  | -0.056 | 0.208  | 0.107             | 0.225  | -0.029 | 0.131  |
| D90             | $a_5$    | 0.749     | 0.494  | -0.107 | 0.199  | 0.111             | 0.194  | -0.056 | 0.125  |
| Bulk density    | $a_6$    | 0.842     | -0.255 | 0.400  | -0.147 | 0.125             | -0.100 | 0.208  | -0.092 |
| Tapped density  | $a_7$    | 0.066     | 0.369  | 0.836  | 0.135  | 0.010             | 0.145  | 0.436  | 0.085  |
| True density    | $a_8$    | 0.321     | -0.312 | -0.481 | 0.376  | 0.047             | -0.122 | -0.250 | 0.237  |
| Hausner ratio   | $a_9$    | -0.780    | 0.469  | 0.277  | 0.192  | -0.115            | 0.184  | 0.144  | 0.121  |
| Compressibility | $a_{10}$ | -0.750    | 0.527  | 0.223  | 0.222  | -0.111            | 0.207  | 0.116  | 0.140  |
| Porosity        | $a_{11}$ | -0.834    | 0.243  | -0.422 | 0.164  | -0.123            | 0.095  | -0.220 | 0.103  |
| BFE             | $a_{12}$ | 0.656     | 0.315  | -0.272 | 0.394  | 0.097             | 0.123  | -0.142 | 0.248  |
| SI              | $a_{13}$ | -0.009    | -0.489 | 0.132  | 0.726  | -0.001            | -0.192 | 0.069  | 0.458  |
| FRI             | $a_{14}$ | -0.878    | 0.026  | 0.119  | -0.076 | -0.130            | 0.010  | 0.062  | -0.048 |
| SE              | $a_{15}$ | -0.787    | -0.093 | -0.075 | 0.105  | -0.116            | -0.037 | -0.039 | 0.066  |
| CBD             | $a_{16}$ | 0.781     | -0.171 | 0.354  | -0.283 | 0.115             | -0.067 | 0.184  | -0.179 |

**Table S10.** Principal component scores and CQAs. (F1-F4 are four PCs scores).

|     | F1     | F2    | F3     | F4     | Dissolution 5min<br>(%) | Dissolution 10min<br>(%) | Dissolution 15min<br>(%) |
|-----|--------|-------|--------|--------|-------------------------|--------------------------|--------------------------|
| A1  | 39.93  | 7.14  | -58.12 | 112.64 | 87.13                   | 88.10                    | 99.70                    |
| A2  | 59.92  | 11.23 | -65.08 | 135.10 | 86.77                   | 87.39                    | 98.72                    |
| A3  | 39.62  | 7.71  | -47.39 | 98.28  | 82.99                   | 85.72                    | 96.26                    |
| B1  | 41.78  | 7.29  | -61.41 | 122.94 | 90.65                   | 90.56                    | 102.24                   |
| B2  | 64.39  | 11.95 | -68.00 | 145.71 | 88.54                   | 88.54                    | 100.25                   |
| B3  | 38.29  | 7.05  | -54.74 | 112.52 | 86.69                   | 87.21                    | 98.59                    |
| B4  | -2.96  | 0.45  | -15.76 | 40.89  | 83.78                   | 85.89                    | 96.42                    |
| B5  | 54.31  | 10.68 | -54.67 | 121.51 | 82.11                   | 84.66                    | 95.65                    |
| B6  | 35.13  | 6.50  | -52.12 | 108.16 | 86.16                   | 87.13                    | 98.49                    |
| B7  | 106.35 | 20.15 | -91.48 | 211.40 | 89.33                   | 88.62                    | 100.50                   |
| B8  | 115.59 | 22.16 | -92.88 | 221.32 | 87.13                   | 87.74                    | 99.36                    |
| B9  | 35.23  | 6.64  | -43.78 | 95.57  | 84.04                   | 85.98                    | 96.69                    |
| B10 | 65.74  | 12.16 | -64.46 | 142.25 | 88.01                   | 88.36                    | 100.23                   |
| C1  | 86.29  | 15.79 | -83.18 | 174.05 | 84.92                   | 86.60                    | 97.74                    |
| C2  | 42.86  | 7.63  | -61.06 | 121.25 | 84.57                   | 86.42                    | 97.59                    |
| C3  | 54.75  | 9.98  | -64.21 | 132.91 | 87.66                   | 88.27                    | 100.08                   |
| C4  | 49.52  | 9.49  | -55.04 | 116.67 | 85.01                   | 86.77                    | 97.90                    |
| C5  | 63.71  | 12.75 | -55.56 | 128.75 | 82.81                   | 85.28                    | 96.24                    |
| D1  | 44.68  | 7.92  | -61.78 | 119.21 | 84.48                   | 86.16                    | 97.40                    |
| D2  | 40.84  | 7.11  | -64.21 | 125.60 | 84.04                   | 85.54                    | 96.50                    |
| D3  | 62.98  | 11.90 | -65.25 | 133.74 | 86.25                   | 87.21                    | 98.53                    |
| D4  | 61.80  | 11.50 | -61.81 | 131.58 | 86.69                   | 87.30                    | 98.72                    |
| D5  | 54.22  | 10.58 | -56.82 | 121.96 | 84.92                   | 86.77                    | 97.87                    |
| D6  | 100.09 | 18.57 | -91.60 | 196.88 | 89.42                   | 89.51                    | 101.18                   |
| D7  | 94.15  | 17.76 | -83.13 | 180.09 | 84.40                   | 85.98                    | 97.20                    |
| D8  | 44.36  | 8.00  | -60.56 | 119.54 | 86.95                   | 88.10                    | 99.54                    |
| D9  | 58.31  | 10.66 | -66.91 | 138.64 | 89.68                   | 90.12                    | 101.28                   |
| D10 | 31.50  | 5.95  | -48.98 | 97.98  | 85.81                   | 87.04                    | 98.01                    |
| D11 | -4.91  | 0.11  | -16.59 | 35.14  | 78.41                   | 83.87                    | 94.27                    |
| D12 | 60.20  | 11.86 | -57.48 | 123.97 | 82.11                   | 85.19                    | 95.84                    |
| D13 | 99.76  | 19.09 | -86.31 | 199.84 | 85.98                   | 87.13                    | 98.19                    |
| D14 | 100.62 | 19.21 | -85.32 | 196.92 | 86.86                   | 87.48                    | 99.25                    |
| D15 | 39.63  | 7.63  | -45.67 | 92.37  | 81.66                   | 84.22                    | 95.47                    |
| D16 | 57.72  | 10.55 | -63.02 | 134.41 | 89.77                   | 90.47                    | 101.46                   |
| D17 | 33.34  | 6.46  | -48.82 | 96.44  | 84.92                   | 86.25                    | 97.46                    |
| D18 | 59.81  | 11.15 | -66.80 | 135.94 | 85.36                   | 86.86                    | 97.94                    |

**Table S11.** Comparison of the actual and predicted values of dissolution in the PCA-ANN model. (AE, absolute error; RE, relative error).

| MCC | Dissolution at 5 min (%) |           |      |      | Dissolution at 10 min (%) |           |      |      | Dissolution at 15 min (%) |           |      |      |
|-----|--------------------------|-----------|------|------|---------------------------|-----------|------|------|---------------------------|-----------|------|------|
|     | Actual                   | Predicted | AE   | RE   | Actual                    | Predicted | AE   | RE   | Actual                    | Predicted | AE   | RE   |
| A1  | 85.36                    | 84.27     | 1.09 | 1.28 | 86.86                     | 86.10     | 0.76 | 0.88 | 97.94                     | 97.54     | 0.40 | 0.41 |
| B3  | 86.69                    | 85.19     | 1.50 | 1.73 | 87.21                     | 86.94     | 0.27 | 0.31 | 98.59                     | 98.28     | 0.31 | 0.31 |
| B6  | 86.77                    | 85.40     | 1.37 | 1.58 | 87.39                     | 87.18     | 0.21 | 0.24 | 98.72                     | 98.62     | 0.10 | 0.10 |
| C3  | 84.92                    | 84.44     | 0.48 | 0.57 | 86.77                     | 86.15     | 0.62 | 0.72 | 97.87                     | 97.29     | 0.58 | 0.60 |
| D8  | 85.01                    | 84.27     | 0.74 | 0.87 | 86.77                     | 86.09     | 0.68 | 0.78 | 97.90                     | 97.37     | 0.53 | 0.54 |
| D12 | 88.01                    | 88.49     | 0.48 | 0.55 | 88.36                     | 88.23     | 0.13 | 0.15 | 100.23                    | 100.10    | 0.13 | 0.13 |
